# Supplementary material
Source: PubMed Central journal article supplement (PMC8026726)

# Singlets determination

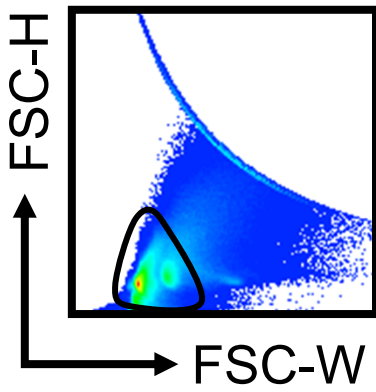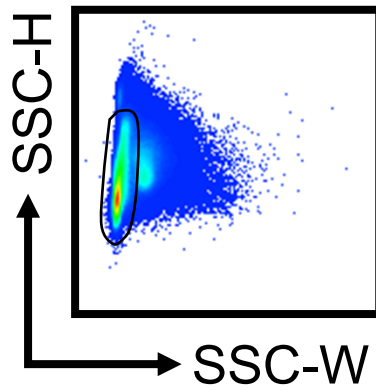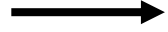

# T cells subsets gating

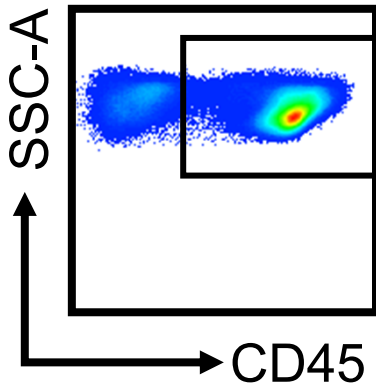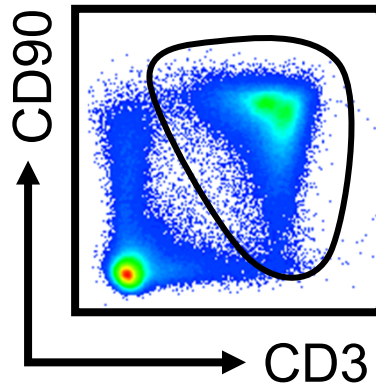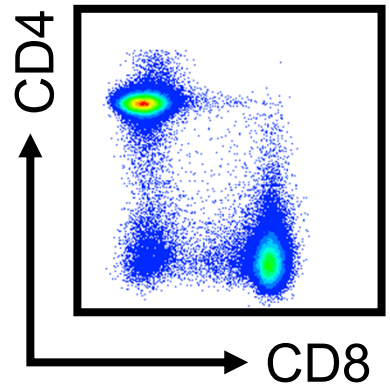

Supplement: NIHMS1667200-supplement-1.pdf [file NIHMS1667200-supplement-1.pdf]
